# Supplementary material for: Differential signaling mechanism for HIV-1 Nef-mediated production of IL-6 and IL-8 in human astrocytes
Source: PubMed Central journal article supplement (PMC4467202; doi:10.1038/srep09867), 2015-06-15
Supplement: srep09867-s1.pdf [file srep09867-s1.pdf]

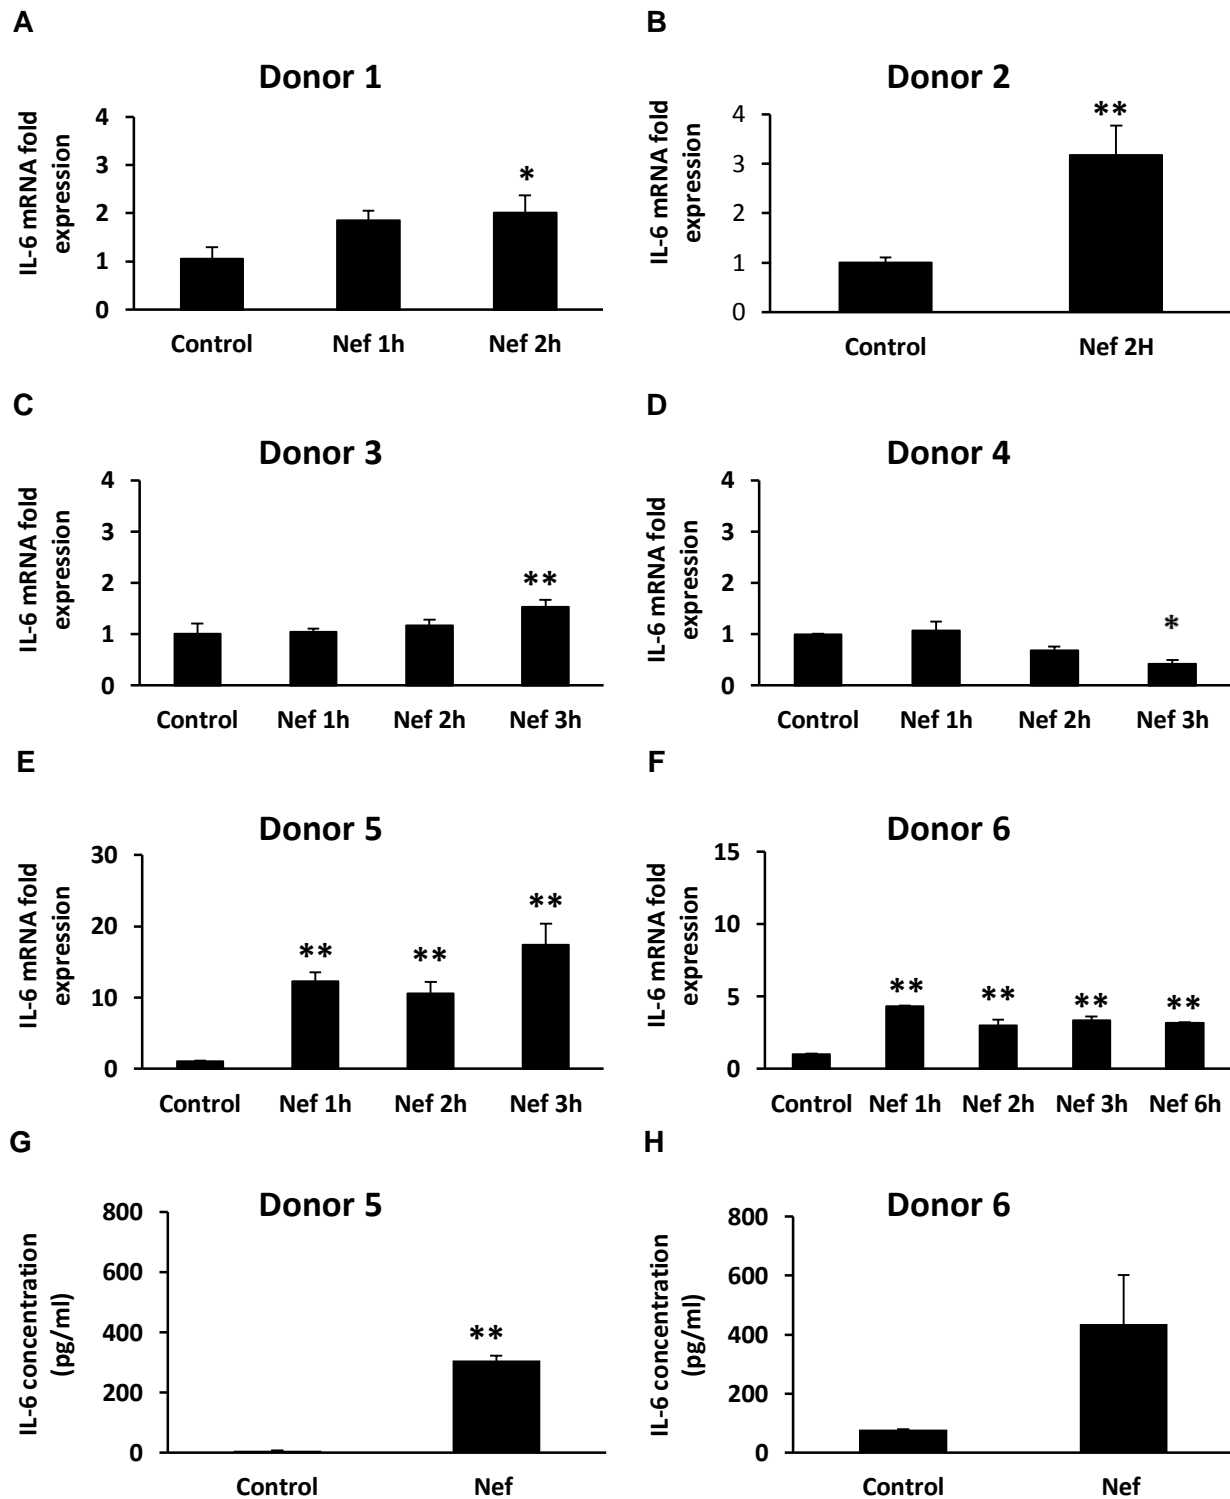

**Figure S1: HIV-1 Nef treatment induces IL-6 production in human primary fetal astrocytes (HFA).**  $1 \times 10^6$  HFA were seeded in 12-well plates and were treated with HIV-1 Nef for the times indicated. The cells were harvested at 1 h ~ 6 h for total RNA isolation and the expression levels of IL-6 mRNA were determined by real time RT-PCR (A, B, C, D, E and F). In separate experiments, IL-6 concentrations released in the supernatants were measured at 24 h by multiplex cytokine assay (G and H). Each of the bars represents mean  $\pm$  SE of triplicates. Statistical analysis was performed using one-way ANOVA with an LSD post-hoc test in which \* represents p-value  $\leq 0.05$  and \*\* represents p-value  $\leq 0.01$ .

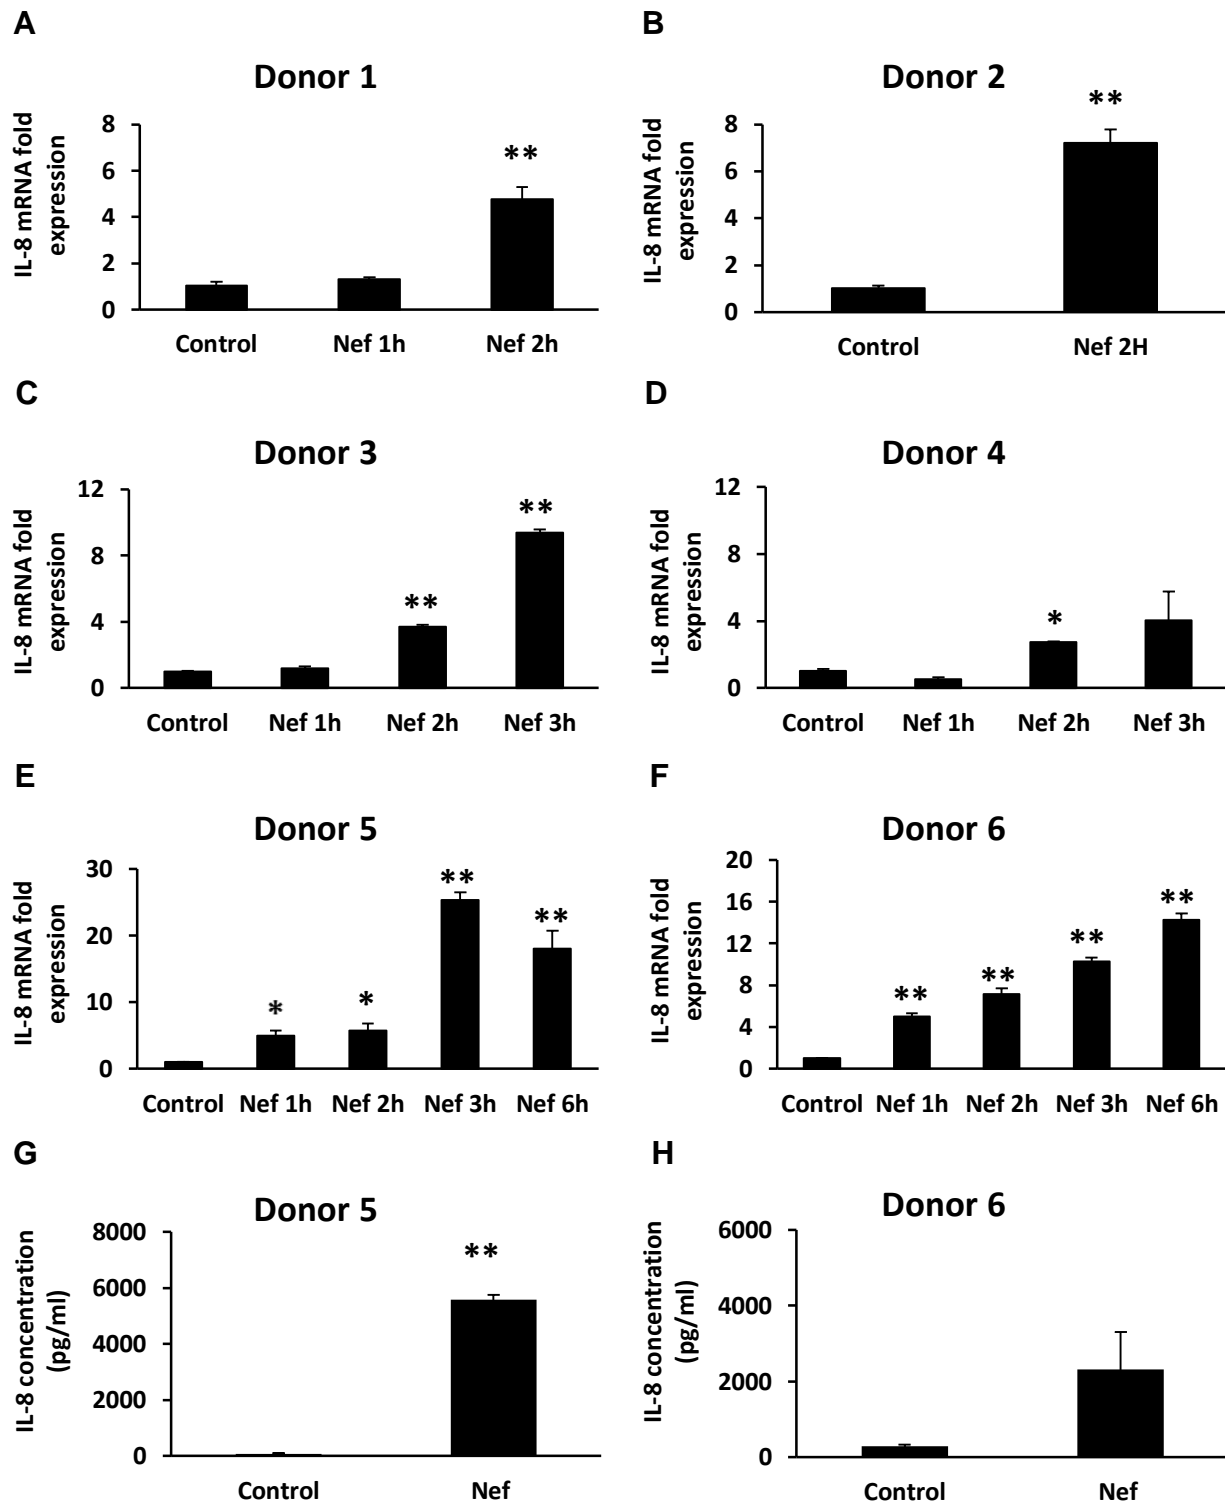

**Figure S2: HIV-1 Nef treatment induces IL-8 production in human primary fetal astrocytes (HFA).**  $1 \times 10^6$  HFA were seeded in 12-well plates and were treated with HIV-1 Nef for the times indicated. The cells were harvested at 1 h ~ 6 h for total RNA isolation and the expression levels of IL-8 mRNA were determined by real time RT-PCR (A, B, C, D, E and F). In separate experiments, IL-8 concentrations released in the supernatants were measured at 24 h by multiplex cytokine assay (G and H). Each of the bars represents mean  $\pm$  SE of triplicates. Statistical analysis was performed using one-way ANOVA with an LSD post-hoc test in which \* represents p-value  $\leq 0.05$  and \*\* represents p-value  $\leq 0.01$ .
